# Supplementary material for: A nanostructured paper-based device for phenylalanine neonatal screening by LED-induced fluorescence
Source: Royal Society of Chemistry journal article supplement (doi:10.1039/c9ay02774b), 2020-01-01
Supplement: c9ay02774b1.pdf [file c9ay02774b1.pdf]

**Electronic supplementary information**

**Nanostructured paper-based platform for phenylalanine neonatal screening by  
LED-induced fluorescence**

**Analytical Methods**

Cristian M. Moreira, Evelyn Marín-Barroso, Sirley V. Pereira, Julio Raba, Germán A. Messina, Franco A. Bertolino\*

INQUISAL, Departamento de Química, Facultad de Química, Bioquímica y Farmacia,  
Universidad Nacional de San Luis, Chacabuco 917, D5700BWS. San Luis, Argentina.

Author to whom correspondence should be addressed: (e-mail) [bertolin@unsl.edu.ar](mailto:bertolin@unsl.edu.ar).

## Electronic supplementary information

### Sample extraction

Neonatal samples and control samples were provided by the Blood Spot PHENYLALANINE NEONATAL-MW Kit. The manufacturer's instructions specifies how these samples were obtained: blood samples were spotted in filter paper number 903 in the center of a 1 cm circle.

The samples were pretreated following the procedure proposed by Seia et al.<sup>1</sup> with some modifications.

Briefly, the surface of the filter paper N° 903 with the blood sample was dried at room temperature for 12 h, avoiding heat and sunlight. then the samples were stored at 4 °C until the time of the studies.

For the tests, control samples of the Phenylalanine Blood Spot MW enzyme analysis kit and neonatal samples were used. In the quantification of Phe, a disc of filter paper with the bloodstain was sectioned and placed in an Eppendorf tube with 200 µL in glycine buffer pH 8.00 to 0.2 M and treated to a sonication procedure for 2 minutes. Finally, the contents of all the tubes were aspirated and the eluted samples were stored at 4 °C until use.

**Table 1.** Within-day and between-day precision for three levels of controls.

| <sup>a</sup> Within-day (µM)  | <sup>a</sup> Mean (µM) | <sup>a</sup> SD (µM) | CV (%) |
|-------------------------------|------------------------|----------------------|--------|
| Low (60)                      | 60.62                  | 2.273                | 3.75   |
| Medium (420)                  | 419.4                  | 21.93                | 5.23   |
| High (900)                    | 899.6                  | 37.07                | 4.12   |
| <sup>a</sup> Between-day (µM) |                        |                      |        |

|              |       |       |      |
|--------------|-------|-------|------|
| Low (60)     | 66.52 | 3.412 | 5.13 |
| Medium (420) | 425.4 | 24.76 | 5.82 |
| High (900)   | 886.1 | 59.11 | 6.67 |

<sup>a</sup> Phe concentration (μM)

**Figure S1.** Selectivity study at normal physiologic levels of AA (66  $\mu$ M).

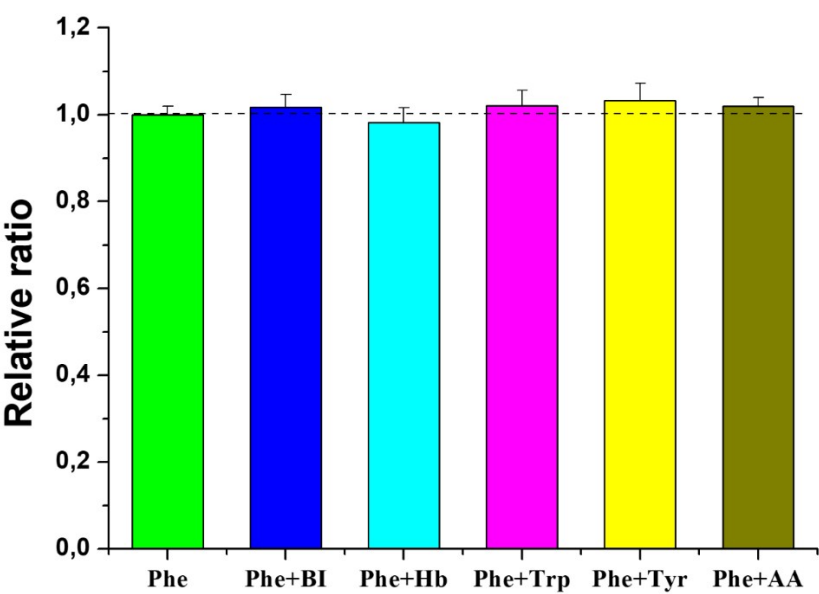

## References

- 1 M. A. Seia, P. W. Stege, S. V. Pereira, I. E. De Vito, J. Raba and G. A. Messina, *Anal. Biochem.*, 2014, **463**, 31–37.
